# Supplementary material for: Vitamin D Content of Australian Native Food Plants and Australian-Grown Edible Seaweed
Source: MDPI journal article supplement (doi:10.3390/nu10070876), 2018-07-06
Supplement: s1 [file s1]

## Supplementary Materials

**Supplementary Table S1.** Description of plant and algae samples included in the current study.

| Common name<br>(Botanical name)                              | Food type | Plant part                        | Quantity | Location | Processing                                                                                                                       | Edible/<br>Toxic    |
|--------------------------------------------------------------|-----------|-----------------------------------|----------|----------|----------------------------------------------------------------------------------------------------------------------------------|---------------------|
| Wattleseed<br>( <i>Acacia victoriae</i> )                    | Plant     | Leaf                              | 1 kg     | SA       | Picked fresh morning of shipping August 2017                                                                                     | Toxic <sup>a</sup>  |
|                                                              |           | Raw seed                          | 200 g    |          | Harvested January 2017                                                                                                           | Edible <sup>a</sup> |
|                                                              |           | Roasted, milled seed              | 188 g    |          | Processed as needed, seeds roasted in a rotating drum roaster for 20 min at 400 °C, seeds ground in a grain mill                 | Edible <sup>a</sup> |
| Tasmanian mountain pepper<br>( <i>Tasmannia lanceolata</i> ) | Plant     | Leaf                              | 1 kg     | TAS      | Picked fresh morning of shipping August 2017                                                                                     | Edible <sup>a</sup> |
|                                                              |           | Dried leaf                        | 200 g    |          | Harvested March–May 2017, warm air-dried                                                                                         | Edible <sup>a</sup> |
|                                                              |           | Fresh berries                     | 1 kg     |          | Frozen to <4 °C                                                                                                                  | Edible <sup>a</sup> |
|                                                              |           | Dried berries                     | 200 g    |          | Harvested March–May 2017, warm air-dried                                                                                         | Edible <sup>a</sup> |
| Lemon myrtle<br>( <i>Backhousia citriodora</i> )             | Plant     | Leaf                              | 1 kg     | NSW      | Picked fresh morning of shipping August 2017                                                                                     | Edible <sup>a</sup> |
|                                                              |           | Dried Leaf                        | 200 g    |          | Machine harvested morning of processing, leaf and sticks separated, leaves dried in an air dryer for 12–24 h                     | Edible <sup>a</sup> |
| Wakame<br>( <i>Undaria pinnatifida</i> )                     | Algae     | Fresh upper leaf and central stem | 1 kg     | TAS      | Chilled to 4 °C after harvest August 2017                                                                                        | Edible <sup>b</sup> |
|                                                              |           | Dried upper leaf and central stem | 100 g    |          | Chilled to 4 °C after harvest, processed <48 h after harvest, blanched 45 s at 70 °C, plunged into ice water, drained, air-dried | Edible <sup>b</sup> |
| Kombu<br>( <i>Lessonia corrugata</i> )                       | Algae     | Fresh leaf                        | 1 kg     | TAS      | Chilled to 4 °C after harvest August 2017                                                                                        | Edible <sup>b</sup> |
|                                                              |           | Dried leaf                        | 100 g    |          | Chilled to 4 °C after harvest, processed <48 h after harvest, chopped, air-dried                                                 | Edible <sup>b</sup> |

SA, South Australia; TAS, Tasmania; and NSW, New South Wales. <sup>a</sup> Hegarty, M.P.; Wills, R.B.H. Food safety of Australian plant bushfoods. Rural Industries, Research Development Corporation: Barton, A.C.T., 2001. <sup>b</sup> Sanderson, J.C.; Di Benedetto, R. Tasmanian seaweeds for the edible market. Department of Sea Fisheries, Marine Laboratory: Taroona, Tasmania, 1988.
